# Supplementary material for: Whole-cell biosensing by siderophore-based molecular recognition and localized surface plasmon resonance
Source: Royal Society of Chemistry journal article supplement (doi:10.1039/c8ay02180e), 2018-12-17
Supplement: c8ay02180e1.pdf [file c8ay02180e1.pdf]

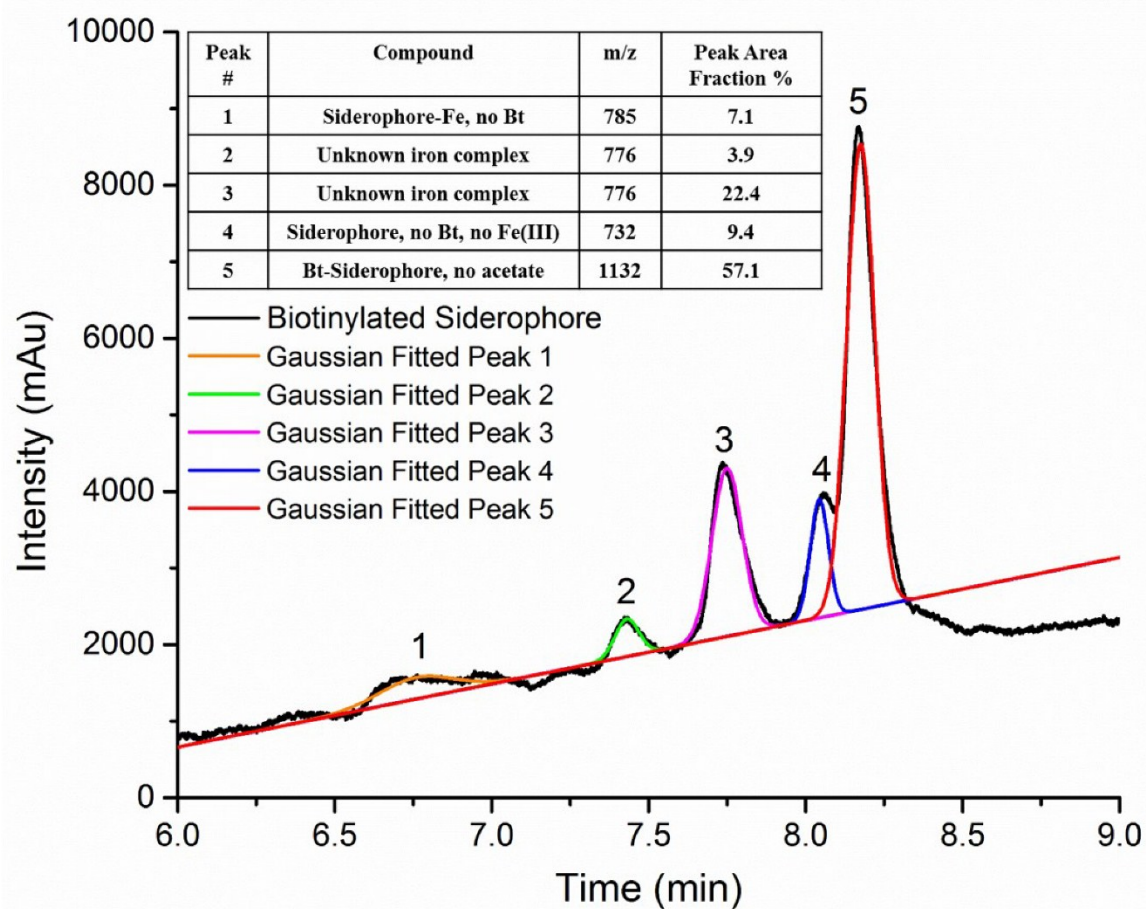

Figure S1.

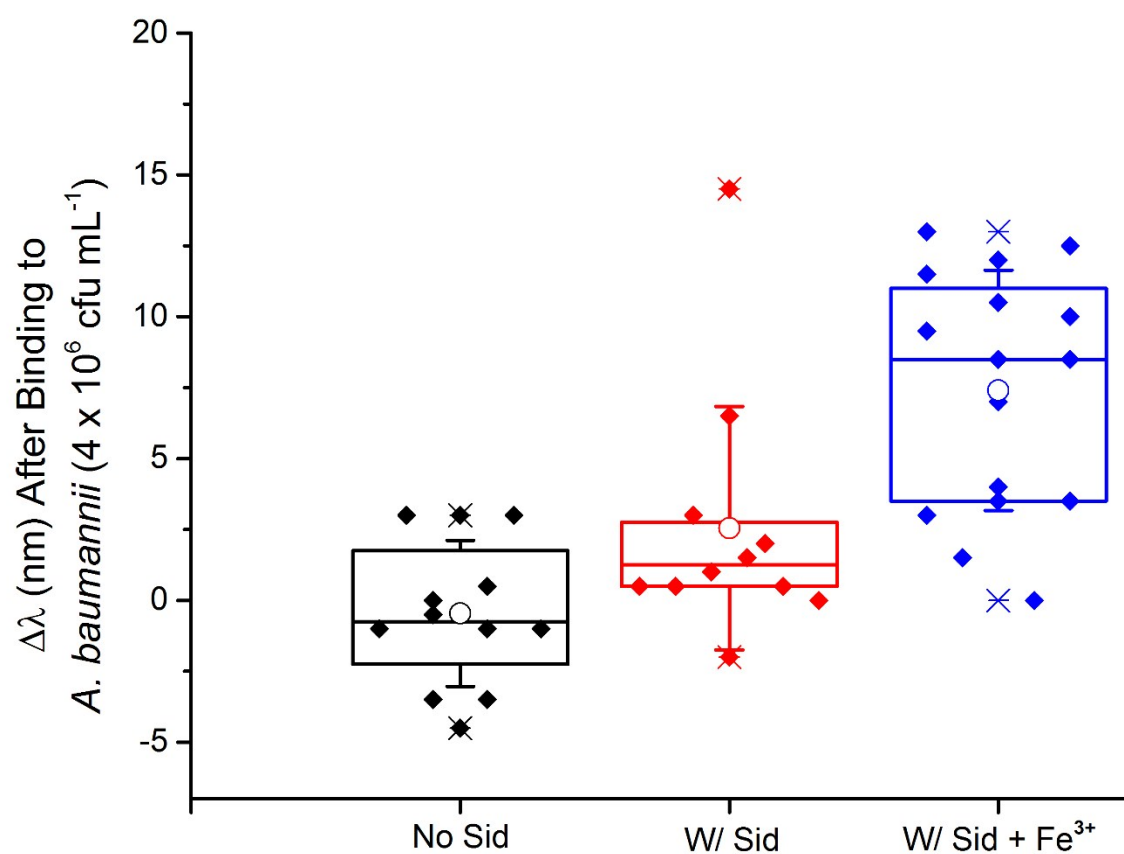

Figure S2.

|                                                                                     | Control | <i>P. aeruginosa</i> | <i>E. coli</i> | <i>B. cereus</i> |
|-------------------------------------------------------------------------------------|---------|----------------------|----------------|------------------|
| $t_{exp}$<br>( $t$ -values calculated<br>against <i>A. baumannii</i> <sup>a</sup> ) | 5.63    | 4.85                 | 4.19           | 5.21             |
| $t_{0.999}^v$                                                                       | 3.75    | 3.71                 | 3.71           | 3.71             |

<sup>a</sup> $t$ -value for all bacteria at a 99.9% confidence level; n = 16 (*A. baumannii*); 10 (control); 12 (*P. aeruginosa*, *E. coli*, and *B. cereus*).

Table S1.
